# Supplementary material for: Transcriptome Analysis Revealed Potential Neuro-Immune Interaction in Papillary Thyroid Carcinoma Tissues
Source: MDPI journal article supplement (doi:10.3390/diseases11010009), 2023-01-04
Supplement: s1 [file s1]

**Table 2. Software and packages used in this study.**

| Methods                                    | References                                                       | Link                                                                                                                                                                                                                                                                |
|--------------------------------------------|------------------------------------------------------------------|---------------------------------------------------------------------------------------------------------------------------------------------------------------------------------------------------------------------------------------------------------------------|
| <b>Trimmomatic</b>                         | Bolger, Lohse et al. 2014                                        |                                                                                                                                                                                                                                                                     |
| <b>STAR</b>                                | Dobin, Davis et al. 2013                                         |                                                                                                                                                                                                                                                                     |
| <b>FeatureCounts</b>                       | Liao, Smyth et al. 2014                                          |                                                                                                                                                                                                                                                                     |
| <b>DESeq2</b>                              | Love, Huber et al. 2014                                          |                                                                                                                                                                                                                                                                     |
| <b>Enrichr</b>                             | Xie, Bailey et al. 2021                                          |                                                                                                                                                                                                                                                                     |
| <b>Leiden algorithm</b>                    | Traag, Waltman et al. 2019                                       | <a href="https://doi.org/10.48550/arXiv.1802.03426">https://doi.org/10.48550/arXiv.1802.03426</a>                                                                                                                                                                   |
| <b>Appyters</b>                            |                                                                  | <a href="https://appyters.maayanlab.cloud/#/Enrichment_Analysis_Visualizer">https://appyters.maayanlab.cloud/#/Enrichment_Analysis_Visualizer</a>                                                                                                                   |
| <b>Github</b>                              |                                                                  | <a href="https://github.com/MaayanLab/Enrichr-Viz-Appyter/blob/master/Enrichr-Processed-Library-Storage/Scatterplot/scatter_libs.py">https://github.com/MaayanLab/Enrichr-Viz-Appyter/blob/master/Enrichr-Processed-Library-Storage/Scatterplot/scatter_libs.py</a> |
| <b>Gene Set Enrichment Analysis (GSEA)</b> | Subramanian, Tamayo et al. 2005                                  |                                                                                                                                                                                                                                                                     |
| <b>Gene Set Variation Analysis (GSVA)</b>  | Charoentong, Finotello et al. 2017<br>Bagaev, Kotlov et al. 2021 |                                                                                                                                                                                                                                                                     |
