# Supplementary figures and images for: Transcriptome Analysis Revealed Potential Neuro-Immune Interaction in Papillary Thyroid Carcinoma Tissues
Source: MDPI journal article supplement (doi:10.3390/diseases11010009), 2023-01-04

A

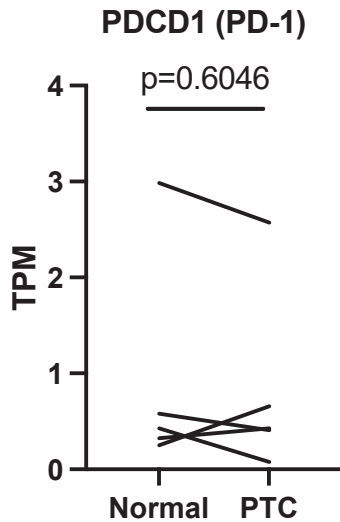

B

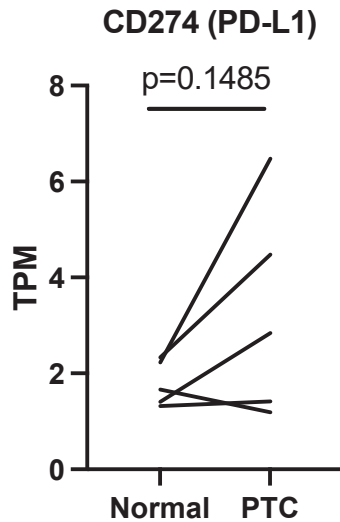

Supplement: s1 [file s1]
